# Supplementary material
Source: publisher figshare collection journal article supplement (https://gsapubs.figshare.com/articles/dataset/_/12346904)

TABLE DR1. PARAMETERS USED FOR THE IMPACT SIMULATION.

| Density<br>(kg.m <sup>-3</sup> ) | Sound speed<br>(m.s <sup>-1</sup> ) | Hugoniot<br>parameter | Grüneisen<br>coefficient | Yield stress<br>(GPa) |
|----------------------------------|-------------------------------------|-----------------------|--------------------------|-----------------------|
| 2880                             | 4800                                | 1.34                  | 2                        | 0.3                   |

DR 2006069

+ Video 1.avi  
Video2.avi

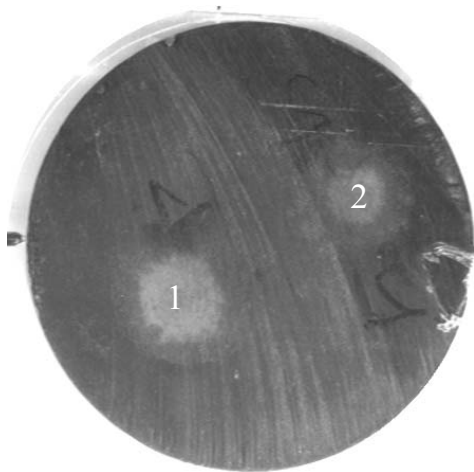

DR 2006069

+ Video 1.avi  
Video2.avi

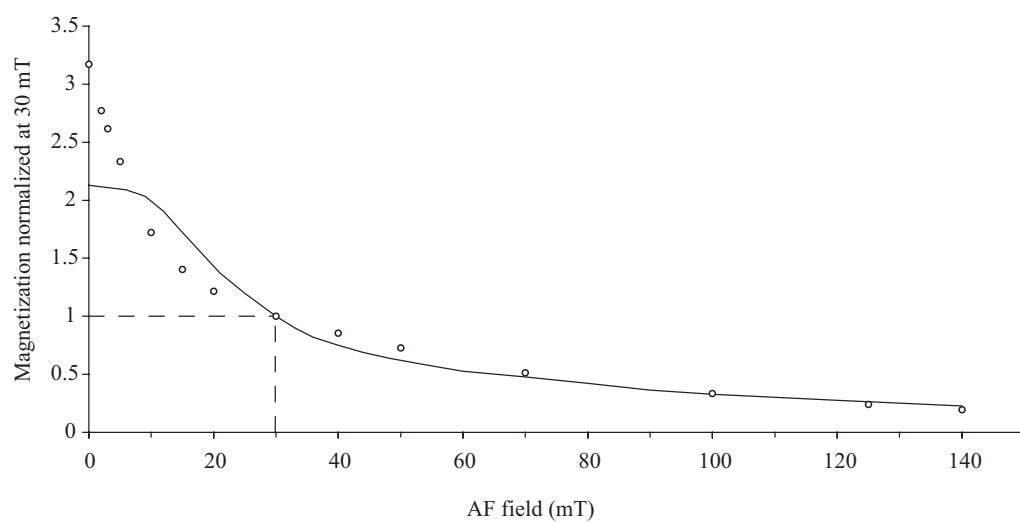

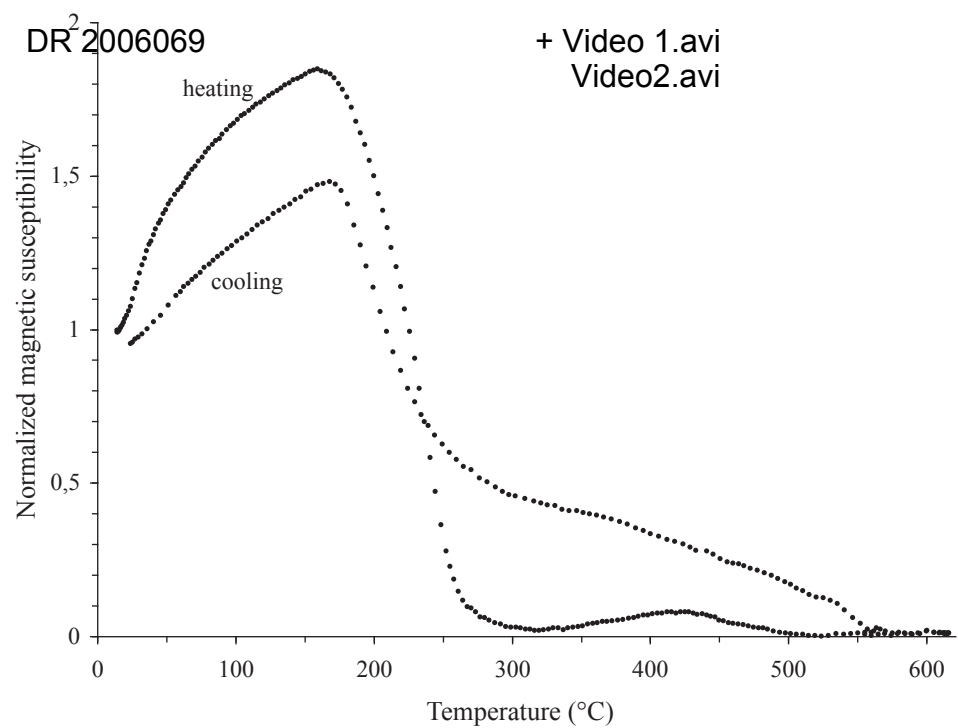

Supplement: Supplementary file 1 [file 1]
